# Supplementary material for: Transcriptomic Characterization Reveals Attributes of High Influenza Virus Productivity in MDCK Cells
Source: MDPI journal article supplement (doi:10.3390/v13112200), 2021-11-01
Supplement: s1 [file s1]

Supplementary Materials

# Transcriptomic Characterization Reveals Attributes of High Influenza Virus Productivity in MDCK Cells

**Table S1.** The TPM of top 20 most abundant transcripts.

| Rank | Gene Symbol | Description                                     | Average TPM |       |        |       |       |
|------|-------------|-------------------------------------------------|-------------|-------|--------|-------|-------|
|      |             |                                                 | H1-0        | H1-8* | H1-16  | P-0   | P-8   |
| 1    | IAV-M1      | IAV matrix protein 1                            | 0           | 88695 | 65993  | 0     | 76368 |
| 2    | IAV-NS1     | IAV nonstructural protein 1                     | 0           | 88392 | 60070  | 0     | 83935 |
| 3    | IAV-NEP     | IAV nonstructural protein 2                     | 0           | 79468 | 57491  | 0     | 76250 |
| 4    | IAV-M2      | IAV matrix protein 2                            | 0           | 69210 | 54393  | 0     | 58047 |
| 5    | IAV-NP      | IAV nucleoprotein                               | 0           | 67307 | 29166  | 0     | 57682 |
| 6    | MT-COX1     | Mitochondrially Cytochrome c oxidase, subunit 1 | 30013       | 57279 | 101864 | 27630 | 49648 |
| 7    | MT-ATP8     | Mitochondrial ATP synthase, Fo subunit 8        | 36261       | 50936 | 98383  | 32275 | 43588 |
| 8    | MT-ATP6     | Mitochondrial ATP synthase, Fo subunit 6        | 36721       | 50135 | 84189  | 30996 | 40968 |
| 9    | IAV-HA      | IAV haemagglutinin                              | 0           | 48553 | 97918  | 0     | 46906 |
| 10   | MT-COX3     | Mitochondrially Cytochrome c oxidase, subunit 3 | 29659       | 42137 | 71613  | 23968 | 35282 |
| 11   | MT-COX2     | Mitochondrially Cytochrome c oxidase, subunit 2 | 18863       | 32035 | 47988  | 15984 | 26053 |
| 12   | MT-ND1      | Mitochondrial NADH dehydrogenase, subunit 1     | 12781       | 16999 | 27120  | 11043 | 14704 |
| 13   | MT-ND4      | Mitochondrial NADH dehydrogenase, subunit 4     | 10230       | 12277 | 22878  | 9173  | 10553 |
| 14   | TMSB10      | Thymosin Beta 10                                | 4811        | 11940 | 13543  | 4543  | 11381 |
| 15   | MT-ND4L     | Mitochondrial NADH dehydrogenase, subunit 4L    | 9828        | 11180 | 23128  | 9677  | 10315 |
| 16   | MT-ND2      | Mitochondrial NADH dehydrogenase, subunit 2     | 7796        | 10315 | 15025  | 7448  | 9293  |
| 17   | RPS2        | Ribosomal Protein S2                            | 4152        | 10111 | 12917  | 3841  | 6642  |
| 18   | IAV-PB1     | IAV polymerase PB1                              | 0           | 9984  | 26035  | 0     | 9004  |
| 19   | IAV-NA      | IAV neuraminidase                               | 0           | 7904  | 5465   | 0     | 8866  |
| 20   | MT-ND3      | Mitochondrial NADH dehydrogenase, subunit 3     | 3346        | 7129  | 11255  | 2608  | 5471  |
| 22   | IAV-PB2     | IAV polymerase PB2                              | 0           | 6407  | 12052  | 0     | 5737  |
| 78   | IAV-PA      | IAV polymerase PA                               | 0           | 2609  | 3645   | 0     | 2909  |

\*Ranked by average TPM of H1-8.

**Table S2.** The enriched functional classes upon IAV infection by GO in H1 and P.

| Functional Class      | GO Biological Process Term                                                | H1-8/H1-0          |                      |        | P-8/P-0            |                      |        |
|-----------------------|---------------------------------------------------------------------------|--------------------|----------------------|--------|--------------------|----------------------|--------|
|                       |                                                                           | #DEG/<br>#In class | Fold En-<br>richment | FDR    | #DEG/<br>#In class | Fold En-<br>richment | FDR    |
| Upregulated           |                                                                           |                    |                      |        |                    |                      |        |
| Inflammatory Response | Inflammatory response                                                     | 67/266             | 2.13                 | <0.001 | 65/266             | 2.37                 | <0.001 |
| G-protein             | Adenylate cyclase-modulating G protein-coupled receptor signaling pathway | 45/180             | 2.11                 | 0.008  | 43/180             | 2.31                 | 0.002  |
| Downregulated         |                                                                           |                    |                      |        |                    |                      |        |

|                                    |                                                                        |        |      |        |        |      |       |
|------------------------------------|------------------------------------------------------------------------|--------|------|--------|--------|------|-------|
| DNA Replication                    | DNA strand elongation involved in DNA replication                      | 8/14   | 6.27 | 0.007  | 8/14   | 8.9  | 0.001 |
|                                    | DNA replication                                                        | 52/132 | 4.32 | <0.001 | 42/132 | 4.96 | 0.000 |
|                                    | Negative regulation of cell cycle phase transition                     | 30/108 | 3.05 | <0.001 | 20/108 | 2.89 | 0.003 |
|                                    | Double-strand break repair via homologous recombination                | 22/87  | 2.77 | 0.003  | 20/87  | 3.58 | 0.000 |
| Protein Processing and Trafficking | Protein targeting to lysosome                                          | 8/16   | 5.48 | 0.013  | 6/16   | 5.84 | 0.037 |
|                                    | Protein localization to Golgi apparatus                                | 9/25   | 3.95 | 0.032  | 9/25   | 5.61 | 0.005 |
|                                    | Golgi to plasma membrane transport                                     | 14/42  | 3.66 | 0.005  | 11/42  | 4.08 | 0.009 |
|                                    | Protein localization to endoplasmic reticulum                          | 17/59  | 3.16 | 0.005  | -      | -    | -     |
|                                    | Regulation of response to endoplasmic reticulum stress                 | 16/70  | 2.51 | 0.046  | -      | -    | -     |
| Lipid Metabolism                   | Fatty-acyl-CoA metabolic process                                       | 9/20   | 4.94 | 0.011  | -      | -    | -     |
|                                    | Very long-chain fatty acid metabolic process                           | 10/29  | 3.78 | 0.024  | 8/29   | 4.3  | 0.033 |
| RNA Processing                     | snRNA processing                                                       | 9/24   | 4.11 | 0.026  | -      | -    | -     |
|                                    | Regulation of transcription elongation from RNA polymerase II promoter | 9/24   | 4.11 | 0.026  | 7/24   | 4.54 | 0.047 |
|                                    | mRNA export from nucleus                                               | 12/45  | 2.93 | 0.044  | -      | -    | -     |
|                                    | Nuclear-transcribed mRNA catabolic process                             | 21/86  | 2.68 | 0.008  | 15/86  | 2.72 | 0.027 |
|                                    | mRNA catabolic process                                                 | 24/107 | 2.46 | 0.006  | 18/107 | 2.62 | 0.015 |
| Cell Growth                        | Regulation of transforming growth factor beta production               | 10/28  | 3.92 | 0.020  | -      | -    | -     |
|                                    | Cell growth                                                            | -      | -    | -      | 13/65  | 3.12 | 0.020 |

#DEG: number of differentially expressed gene enriched in the comparison. #In class: number of genes in the gene set.  
FDR: false discovery rate.

**Table S3.** The enriched functional classes upon IAV infection by GSEA in H1 and P.

| Functional Clas-<br>ses | KEGG Terms                           | H1-8/H1-0 |       |        | P-8/P-0 |        | H1-16/H1-8 |        |
|-------------------------|--------------------------------------|-----------|-------|--------|---------|--------|------------|--------|
|                         |                                      | SIZE      | NES   | FDR    | NES     | FDR    | NES        | FDR    |
| Upregulated             |                                      |           |       |        |         |        |            |        |
| Ribosome                | Ribosome                             | 82        | 2.44  | <0.001 | 2.67    | <0.001 | 2.27       | <0.001 |
| Downregulated           |                                      |           |       |        |         |        |            |        |
| DNA Replication         | DNA replication                      | 35        | -2.66 | <0.001 | -2.50   | <0.001 |            |        |
|                         | Mismatch repair                      | 22        | -2.22 | <0.001 | -2.27   | <0.001 |            |        |
|                         | Base excision repair                 | 31        | -2.02 | 0.004  | -1.96   | 0.004  |            |        |
|                         | Homologous recombination             | 25        | -1.97 | 0.005  | -2.10   | 0.001  |            |        |
|                         | Nucleotide excision repair           | 43        | -1.90 | 0.008  | -1.66   | 0.038  |            |        |
| RNA Processing          | Spliceosome                          | 117       | -2.05 | 0.003  | -1.75   | 0.025  |            |        |
|                         | RNA degradation                      | 55        | -1.67 | 0.036  | -1.73   | 0.028  |            |        |
| Energy Metabo-<br>lism  | Citrate cycle TCA cycle              | 28        | -2.20 | 0.001  | -2.07   | 0.001  | -1.94      | 0.003  |
|                         | Pentose phosphate pathway            | 19        | -2.11 | 0.002  | -1.91   | 0.007  | -2.04      | 0.003  |
|                         | Glycolysis gluconeogenesis           | 38        | -1.83 | 0.013  | -2.21   | <0.001 | -1.73      | 0.019  |
|                         | Fructose and mannose metabo-<br>lism | 26        | -1.71 | 0.028  |         |        | -1.76      | 0.017  |
| Lipid Metabolism        | Sphingolipid metabolism              | 31        |       |        |         |        | -1.68      | 0.031  |
|                         | Butanoate metabolism                 | 21        |       |        |         |        | -1.76      | 0.016  |
|                         | Propanoate metabolism                | 26        |       |        | -1.78   | 0.020  |            |        |
|                         | Endocytosis                          | 134       | -2.01 | 0.004  | -1.94   | 0.006  | -2.03      | 0.002  |
|                         | Lysosome                             | 105       | -1.87 | 0.009  |         |        | -1.63      | 0.046  |

|                                              |                                          |     |       |       |       |        |
|----------------------------------------------|------------------------------------------|-----|-------|-------|-------|--------|
| Protein Pro-<br>cessing and Traf-<br>ficking | Ubiquitin mediated proteolysis           | 121 | −1.63 | 0.042 | −1.67 | 0.039  |
| Others                                       | Antigen processing and presen-<br>tation | 31  | −1.76 | 0.021 |       |        |
|                                              | Regulation of autophagy                  | 18  | −1.74 | 0.022 |       |        |
|                                              | Cell cycle                               | 119 | −2.28 | 0.001 | −2.35 | <0.001 |

SIZE: number of differentially expressed gene enriched in the comparison. NES: normalized enrichment score. FDR: false discovery rate.

**Table S4.** The enriched gene sets by GSEA in H1-0/P-0 and H1-8/P-8 comparison.

| Functional Class                            | GO biological process term                            | SIZE | NES  | H1-0/P-0<br>FDR | H1-8/P-8<br>NES | H1-8/P-8<br>FDR |
|---------------------------------------------|-------------------------------------------------------|------|------|-----------------|-----------------|-----------------|
| <b>Positively Enriched</b>                  |                                                       |      |      |                 |                 |                 |
| RNA pro-<br>cessing                         | Nuclear transcribed mRNA catabolic process            | 112  | 2.23 | <0.001          | 2.23            | 0.001           |
|                                             | NMD (nonsense mediated decay)                         |      |      |                 |                 |                 |
|                                             | rRNA metabolic process                                | 232  | -    | -               | 2.19            | 0.002           |
| Ribosome                                    | Ribosome biogenesis                                   | 278  | 2.50 | <0.001          | 2.00            | 0.018           |
| Translation                                 | Translational termination                             | 87   | 2.65 | <0.001          | 2.11            | 0.004           |
|                                             | Translational initiation                              | 132  | 2.36 | <0.001          | 1.94            | 0.031           |
|                                             | Translational elongation                              | 101  | 2.52 | <0.001          | -               | -               |
|                                             | Mitochondrial translation                             | 100  | 2.64 | <0.001          | 2.07            | 0.007           |
| Mitochondrion<br>and Energy Me-<br>tabolism | Oxidative phosphorylation                             | 63   | 2.27 | <0.001          | 2.16            | 0.003           |
|                                             | Mitochondrial translation                             | 100  | 2.64 | <0.001          | 2.07            | 0.007           |
|                                             | Mitochondrial respiratory chain complex assem-<br>bly | 63   | 2.25 | <0.001          | -               | -               |
|                                             | Electron transport chain                              | 72   | 2.09 | 0.002           | -               | -               |
| DNA Replica-<br>tion                        | DNA replication                                       | 181  | 2.08 | 0.003           | -               | -               |
|                                             | DNA strand elongation                                 | 29   | 1.96 | 0.01            | -               | -               |
| <b>Negatively Enriched</b>                  |                                                       |      |      |                 |                 |                 |
| Antiviral Re-<br>sponse                     | Response to type I interferon                         | 33   | -    | -               | -2.31           | <0.001          |
|                                             | Defense response to virus                             | 90   | -    | -               | -2.27           | <0.001          |
|                                             | Response to virus                                     | 146  | -    | -               | -1.90           | 0.035           |
|                                             | Negative regulation of viral genome replication       | 26   | -    | -               | -1.90           | 0.037           |
|                                             | Immune effector process                               | 248  | -    | -               | -1.89           | 0.039           |
| Protein Traf-<br>ficking                    | Endocytosis                                           | 305  | -    | -               | -1.99           | 0.02            |
|                                             | Golgi vesicle transport                               | 262  | -    | -               | -2.16           | 0.001           |
|                                             | ER to golgi vesicle mediated transport                | 134  | -    | -               | -1.94           | 0.025           |

SIZE: number of differentially expressed gene enriched in the comparison. NES: normalized enrichment score. FDR: false discovery rate.

**Table S5.** Representative differentially expressed genes in antiviral responses.

| Gene Sym-<br>bol | Description                                        | Average TPM |       |       |       |       |
|------------------|----------------------------------------------------|-------------|-------|-------|-------|-------|
|                  |                                                    | H1-0        | H1-8  | H1-16 | P-0   | P-8   |
| RIG-I            | DDX58: DExD/H-box helicase 58                      | 77.77       | 113.1 | 98.55 | 94.33 | 149.7 |
| MDA5             | IFIH1: Interferon Induced With Helicase C Domain 1 | 101.8       | 32.02 | 18.76 | 104.2 | 53.34 |
| TRIM25           | tripartite motif containing 25                     | 95.37       | 52.27 | 37.93 | 107.8 | 73.81 |
| MAVS             | mitochondrial antiviral signaling protein          | 7.82        | 9.37  | 8.95  | 11.30 | 13.42 |
| TLR3             | toll like receptor 3                               | 35.56       | 13.11 | 7.36  | 36.64 | 21.50 |

|         |                                                                                 |       |       |       |       |       |
|---------|---------------------------------------------------------------------------------|-------|-------|-------|-------|-------|
| MYD88   | MYD88 innate immune signal transduction adaptor                                 | 199.0 | 253.3 | 361.3 | 206.4 | 317.9 |
| IRF7    | Interferon Regulatory Factor 7                                                  | 73.09 | 63.21 | 33.41 | 62.45 | 99.83 |
| NFKB1   | nuclear factor kappa B subunit 1                                                | 38.75 | 24.36 | 18.33 | 41.43 | 30.39 |
| NFKB2   | nuclear factor kappa B subunit 2                                                | 31.63 | 15.39 | 6.62  | 25.39 | 19.33 |
| RELB    | RELB proto-oncogene, NF-kB subunit                                              | 11.94 | 26.91 | 21.83 | 9.04  | 20.58 |
| RELA    | RELA proto-oncogene, NF-kB subunit                                              | 78.66 | 52.59 | 41.10 | 75.81 | 63.50 |
| REL     | REL proto-oncogene, NF-kB subunit                                               | 10.69 | 6.97  | 6.79  | 13.29 | 8.06  |
| NFKBIB  | NFKB inhibitor beta                                                             | 74.92 | 81.37 | 63.83 | 64.56 | 72.28 |
| NFKBID  | NFKB inhibitor delta                                                            | 1.52  | 6.62  | 4.49  | 2.00  | 4.39  |
| NFKBIE  | NFKB Inhibitor Epsilon                                                          | 8.78  | 21.83 | 11.57 | 6.75  | 13.62 |
| NFKBIL1 | NFKB inhibitor like 1                                                           | 20.24 | 34.51 | 34.88 | 16.89 | 26.12 |
| TYK2    | tyrosine kinase 2                                                               | 31.18 | 15.88 | 9.02  | 37.52 | 22.02 |
| JAK1    | Janus kinase 1                                                                  | 124.4 | 44.74 | 29.39 | 150.7 | 65.53 |
| STAT1   | signal transducer and activator of transcription 1                              | 120.1 | 50.47 | 38.43 | 147.9 | 78.67 |
| STAT2   | signal transducer and activator of transcription 2                              | 72.81 | 27.97 | 21.75 | 89.16 | 44.24 |
| STAT3   | signal transducer and activator of transcription 3                              | 73.99 | 30.10 | 14.29 | 100.2 | 49.22 |
| IRF9    | Interferon Regulatory Factor 9                                                  | 45.93 | 36.69 | 21.28 | 54.90 | 51.06 |
| IFNE    | Interferon Epsilon                                                              | 2.45  | 1.88  | 1.82  | 3.69  | 4.14  |
|         | interferon induced protein with tetratricopeptide repeats                       |       |       |       |       |       |
| IFIT3   | 3                                                                               | 2.57  | 10.18 | 16.34 | 11.35 | 48.23 |
| OAS1    | 2'-5'-oligoadenylate synthetase 1                                               | 256.3 | 183.1 | 144.7 | 327.5 | 350.8 |
| OAS2    | 2'-5'-oligoadenylate synthetase 2                                               | 28.90 | 14.86 | 16.46 | 72.58 | 55.81 |
| OAS3    | 2'-5'-oligoadenylate synthetase 3                                               | 65.99 | 49.41 | 25.11 | 104.5 | 89.37 |
| MX1     | MX dynamin like GTPase 1                                                        | 128.6 | 116.2 | 112.8 | 250.5 | 328.4 |
| MX2     | MX dynamin like GTPase 2                                                        | 17.72 | 7.36  | 4.73  | 61.91 | 66.43 |
| ISG15   | ISG15 ubiquitin like modifier                                                   | 821.9 | 919.9 | 706.0 | 1088  | 1848  |
| ISG20   | interferon stimulated exonuclease gene 20                                       | 20.18 | 28.13 | 21.60 | 30.34 | 51.65 |
| DDX60   | DExD/H-box helicase 60                                                          | 45.23 | 16.67 | 13.26 | 90.93 | 46.38 |
| IRF1    | interferon regulatory factor 1                                                  | 138.7 | 91.95 | 60.42 | 95.97 | 66.40 |
|         | LOC488947: Interferon Induced Protein With Tetratricopeptide Repeats 1          |       |       |       |       |       |
| IFIT1   | SAM and HD domain containing deoxynucleoside triphosphate triphosphohydrolase 1 | 2.64  | 11.82 | 23.70 | 7.29  | 32.82 |
| SAMHD1  | phosphate triphosphohydrolase 1                                                 | 18.21 | 6.93  | 4.98  | 28.01 | 17.56 |
| RSAD2   | radical S-adenosyl methionine domain containing 2                               | 146.8 | 336.8 | 166.3 | 250.8 | 707.8 |
| BST2    | bone marrow stromal cell antigen 2                                              | 323.2 | 217.0 | 225.2 | 454.4 | 376.0 |
| SPON2   | Spondin 2                                                                       | 0.99  | 0.50  | 0.75  | 4.15  | 6.55  |
| CD40    | CD40 molecule                                                                   | 9.30  | 5.16  | 2.58  | 5.93  | 3.48  |
| IRF5    | interferon regulatory factor 5                                                  | 9.06  | 10.26 | 6.95  | 7.33  | 7.21  |
|         | interferon induced protein with tetratricopeptide repeats                       |       |       |       |       |       |
| IFIT2   | 2                                                                               | 1.50  | 7.21  | 15.10 | 2.63  | 18.11 |
| CD86    | CD86 molecule                                                                   | 2.67  | 5.01  | 4.76  | 4.63  | 9.28  |
| RNASEL  | ribonuclease L                                                                  | 36.38 | 16.76 | 9.81  | 34.48 | 25.11 |

|         |                                    |       |       |       |       |       |
|---------|------------------------------------|-------|-------|-------|-------|-------|
| SERINC3 | serine incorporator 3              | 22.88 | 8.78  | 6.68  | 27.43 | 15.00 |
| IFI44L  | interferon induced protein 44 like | 153.1 | 75.88 | 34.46 | 176.6 | 143.1 |

**Table S6.** Raw data of all the gene expression (Normalized Counts, Average TPM) and DESeq2 output. See Supplementary File 2 Table S6.xlsx.

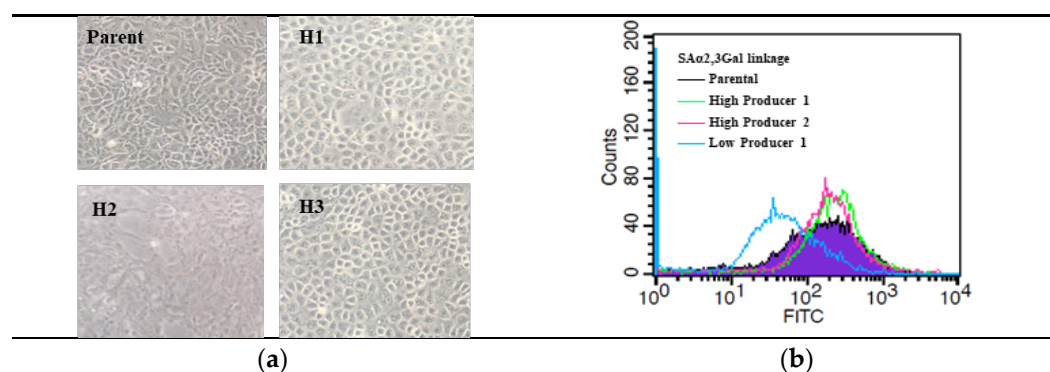

**Figure S1.** (a): Morphology of parental cells and high producing clones. (b): flowcytometric assay of  $\alpha$ -2,3 SA receptor in the H1, H2, L1, and parental cells (P).

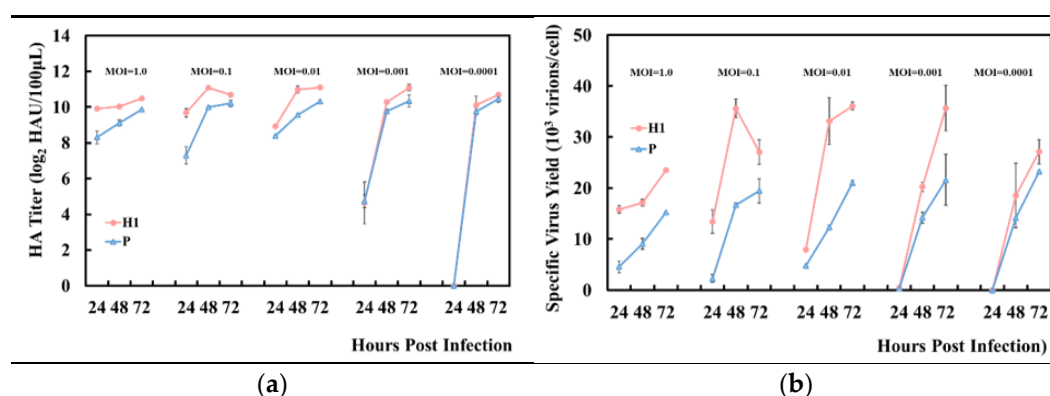

**Figure S2.** H1 has higher virus productivity at different MOIs. (a): HA titer and (b): specific virus yield at different MOIs from 24-72 hpi. Solid red: H1, hollow blue: P.

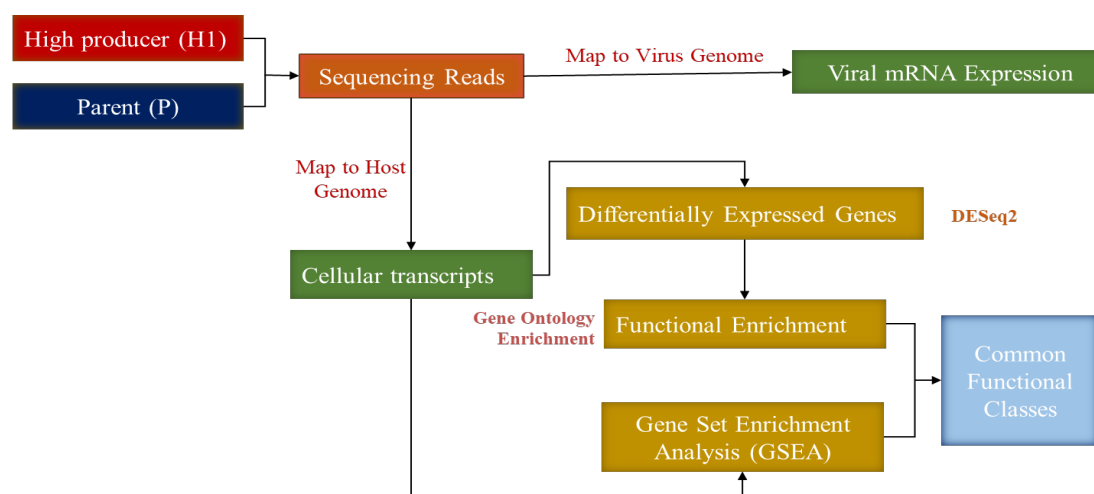

**Figure S3.** Transcriptome analysis pipeline.

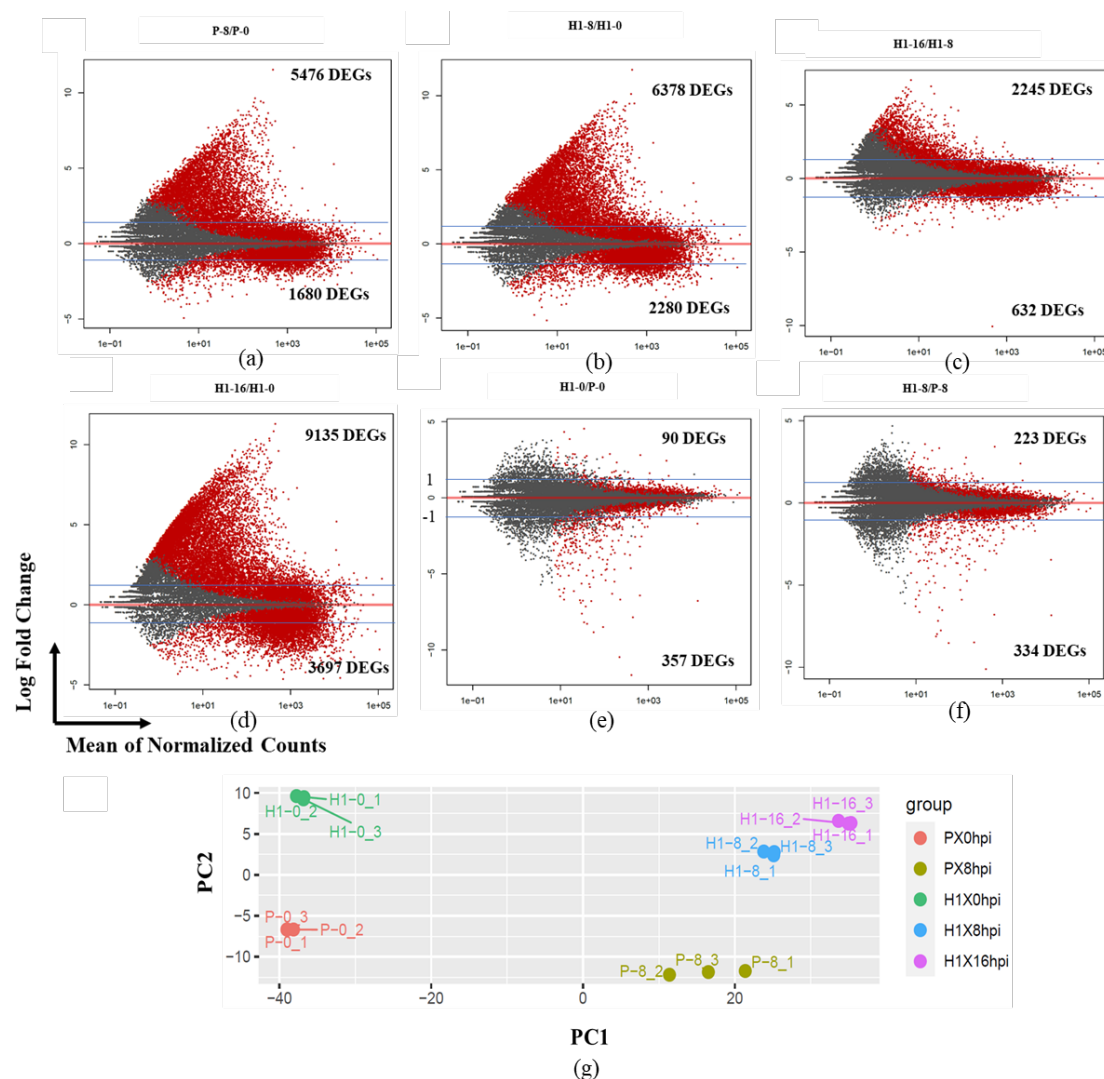

**Figure S4.** Pair-wise comparison gene expression. DESeq2 was applied to identify the differentially expressed genes (DEGs) of (a) H1-0/P-0, (b) H1-8/P-8, (c) H1-16/H1-8, (d) P-8/P-0, (e) H1-8/H1-0, (f) H1-16/H1-0, Red represents transcripts with  $p_{adj} < 0.05$ . (g): Principal Components Analysis of the transcriptome of H1 and parent at 0/8/16 hpi in the synchronized single cycle infection. Uninfected and infected samples are separated along PC1, while samples from H1 or P are separated by PC2.

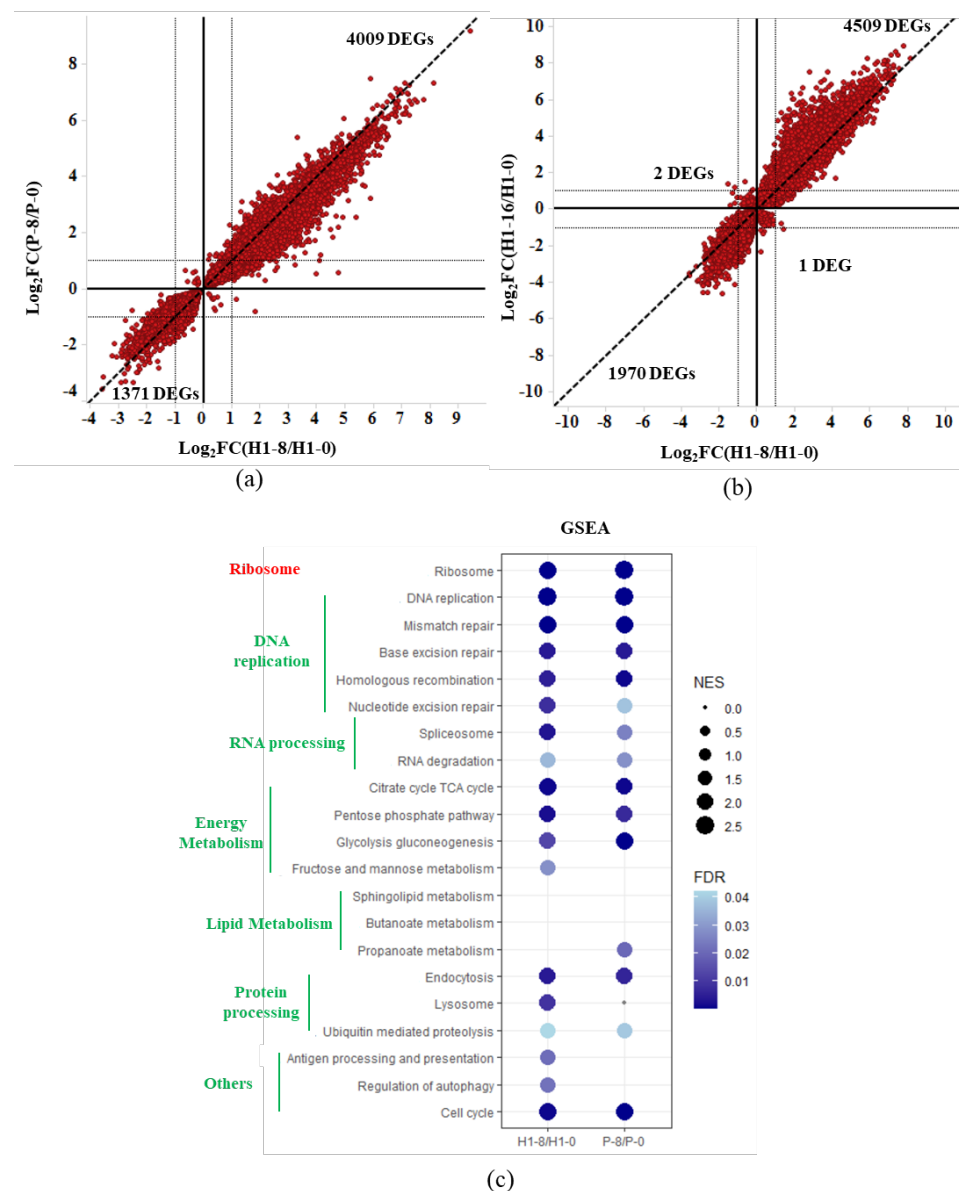

**Figure S5.** Comparison of response upon virus infection in H1 and P. (a): comparison of response between 8 hpi and 0 h in H1 and P. (b) comparison of response of H1 between 8 hpi and 0 h, and between 16 hpi and 0 h. (Dot represents the genes with  $p_{\text{adj}} < 0.05$  in both pair of comparison. The dotted lines mark the fold change of 2 and the black dash line represents equal FC in both pairs of comparison.) (c): GSEA on host response of H1 and P upon IAV infection, dot size represents the normalized enrichment score, dot color represents the FDR. Colors of clusters GO terms represents direction of change – red: up-regulated, green: down-regulated.
